1 **Association between types of physical activity and risk of ischemic**  
2 **heart disease based on US Guidelines: A systematic review and**  
3 **meta-analysis**

4 **Jaewoo Cha<sup>a\*</sup>, MPH, Jeehyun Kim<sup>a</sup>, MPH, and Kwan Hong<sup>a</sup>, MD, MPH**

5 <sup>a</sup>Department of Preventive Medicine, Korea University College of Medicine, Seoul, Republic  
6 of Korea

7 **\* Corresponding author: Jaewoo Cha, MPH**

8 Department of Preventive Medicine, Korea University College of Medicine

9 73, Goryeodae-ro, Seongbuk-gu, Seoul 02841, Republic of Korea

10 Tel: +82 10-5766-7651

11 Fax: +82 2-927-7220

12 Email: [jaewoocha@hira.or.kr](mailto:jaewoocha@hira.or.kr)

13

## 14 **Abstract**

15 **Background:** Mortality from ischemic heart disease (IHD) is increasing worldwide. There is  
16 no available literature regarding the validity of US guidelines for IHD risk reduction through  
17 physical exercise. In this meta-analysis, we aimed to measure the effectiveness of US  
18 guidelines for physical activity in reducing IHD risk based on the types of exercise.

19 **Methods:** Six databases, including MEDLINE, EMBASE, Cochrane Library, CINAHL,  
20 Scopus, and Web of Science, were searched from January 1, 2000, to November 6, 2022. The  
21 most recent literature search was conducted on November 6, 2022, and only English-  
22 language articles were included. Studies designed and conducted on humans on any type of  
23 IHD-related physical activity were included. Study outcomes included heterogeneity among  
24 the studies, overall effects of all types of physical activity, and IHD risk. The random effects  
25 model was measured. A funnel plot was used to assess publication bias.

26 **Results:** When the US guidelines for physical activity were not applied, there was a high  
27 level of heterogeneity in the effects of physical activity by type, with overall effects of 0.764  
28 (odds ratio [OR], 95% confidence interval [CI]: 0.737–0.795). The effect of physical activity  
29 on IHD was 0.593 (OR, 95% CI: 0.489–0.720). No publication bias was observed. After  
30 applying the US guidelines for physical activity, there was a low level of heterogeneity in the  
31 effects of physical activity by type and an observed OR of 0.515 (95% CI: 0.401–0.662) for  
32 myocardial infarction.

33 **Discussion:** Each type of exercise had different effects on reducing IHD, and there were  
34 certain beneficial results if the US guidelines for physical activity were satisfied.

35

## 36 **Introduction**

37 Ischemic heart disease (IHD) is the first leading cause of death worldwide [1]. Every year,  
38 one-third of deaths worldwide are caused by IHD [1]. In the past, IHD was the most serious  
39 health issue and leading cause of death in older people [2]. However, this disease is not  
40 currently restricted to older people [3]. Symptoms of IHD include fast heartbeat, fainting  
41 during exercise, sweating, and fatigue; the most common are chest pain and light-headedness  
42 [2]. Engaging in physical activity is an effective and efficient strategy to prevent IHD [4].  
43 Research shows that exercising could result in an up to three-fold IHD risk reduction [5]. The  
44 metabolic equivalent of task (MET) method is commonly used to estimate exercise intensity  
45 [6] and allows for the calculation of exercise intensity and duration.

46 Moreover, types of exercise are important in reducing the IHD risk [7]. Considering this,  
47 several factors have led many governments to encourage regular physical activities [8,9]. For  
48 example, the US physical activity guidelines suggest 150 min of moderate-level exercise or  
49 75 min of weightlifting [10]. Furthermore, the US launched the ‘move your way’ campaign  
50 based on these guidelines [11]. There have been many attempts to prove the validity of the  
51 US guidelines to the public. Many studies have demonstrated that the US guidelines  
52 effectively improve public health in the general population [12–16]. However, in reality,  
53 people usually consider the type of exercise rather than its duration. This study had two aims:  
54 first, to examine the types of exercise and IHD risk. Second, to perform a meta-analysis to  
55 validate the US guidelines and determine efficient types of exercise.

## 56 **Methods**

57 This study was conducted in accordance with the PRISMA guidelines.

## 58 **Search strategy and eligibility criteria**

59 In this meta-analysis, six databases, including MEDLINE, EMBASE, Cochrane Library,  
60 CINAHL, Scopus, and Web of Science, were searched from January 1, 2000, to November 4,  
61 2022. The most recent literature search was conducted on November 4, 2022, and only  
62 English-language articles were included. The Population, Intervention, Control, and  
63 Outcomes (PICO) method was used to define study characteristics.

64 The inclusion criteria were derived from the PICO method. Exclusion criteria were: 1)  
65 publication date before the year 2000, 2) not written in English, 3) not a primary study, 4) not  
66 a research article, and 5) not relevant to the PICO criteria. Two authors made independent  
67 extractions and discussed with the corresponding author if differences were observed.

68

69 **P:** General population

70 **I:** Participants who satisfied the US guidelines for physical activity

71 **C:** Participants who did not satisfy the US guidelines for physical activity

72 **O:** Reduction of IHD risk

## 73 **Categories of search terms**

74 Physical activity [Mesh Terms and in title and abstract]: Exercise [Mesh], Physical  
75 Conditioning, Human [Mesh], Dancing [Mesh], Swimming [Mesh], Walking [Mesh],  
76 Running [Mesh], Bicycling [Mesh], Muscle Stretching Exercises [Mesh], Weight Lifting  
77 [Mesh]

- 78 Ischemic Heart Disease [Mesh Terms and in title and abstract]: Myocardial Ischemia [Mesh]
- 79 Incidence [Mesh Terms and in title and abstract]: Incidence [Mesh], Heart Disease Risk
- 80 Factors [Mesh]
- 81 Human Subjects [Mesh Terms and in title and abstract]: NOT Models, Animal [Mesh]
- 82 Disease Models, Animal [Mesh], Animals [Mesh]
- 83 English Only [Mesh Terms and in title and abstract]: English [la]
- 84 Years [Mesh Terms and in title and abstract]: 2000:2030 [dp]
- 85 Study Design [Mesh Terms and in title and abstract]: NOT Systematic Reviews as Topic
- 86 [Mesh], Meta-Analysis as Topic [Mesh]

## 87 **Data extraction and quality assessment**

88 After the first title/abstract screening was performed using Microsoft Excel, data was

89 collected through full-length paper reviews [17]. Two authors made an independent

90 assessment of the studies and discussed with the corresponding author if differences were

91 observed. Quality assessment was performed using the Newcastle/Ottawa Scale (NOS),

92 commonly utilized for non-randomized controlled trials [18]. Two authors made an

93 independent assessment of the studies extracted and discussed with the corresponding author

94 if differences were observed.

## 95 **Outcomes**

96 We assessed exercise types and IHD risks in the primary analysis. Secondary outcomes were

97 types and intensity of exercise that satisfied the US guidelines for physical activity and

98 reduction in IHD risk.

## 99 **Data Analysis**

100 We measured the results by assessing the odds ratio (OR) and 95% confidence intervals (CIs)  
101 of the studies. These standards were applied to both categorical and numerical values. A  
102 random-effect model was employed to analyze the results of a comprehensive search. The  
103 obvious and statistical analyses of the meta-analysis were estimated using the  $I^2$  statistics  
104 method [19]. After the data analysis process, a funnel plot was used to assess publication bias,  
105 a major bias in systematic reviews/meta-analyses [20]. Meta-analysis was performed using R  
106 Studio [21].

## 107 **Results**

### 108 **Study population and selection**

109 The literature search resulted in 7,612 articles, after eliminating duplicates. Only 270 studies  
110 satisfied the inclusion and exclusion criteria regarding their titles and abstracts. We extracted  
111 the full text of the 270 studies; however, only seven were included in the final analysis.  
112 Studies were excluded if they were based on the wrong study population (13 studies) or did  
113 not assess the types of exercise according to IHD outcomes. A total of 588,030 participants  
114 were included in the selected studies (Fig 1).

115 **Fig 1.** Study flow chart

### 116 **Literature review (Table 1)**

117 **Study 1** [22]: This cohort study was conducted in 2019 in the US; the types of exercise were  
118 aerobics, weight training, and mixed exercise according to the US guidelines for physical  
119 activity. The target diseases were hypertension, myocardial infarction (MI), high cholesterol,

120 stroke, and coronary heart disease. This study demonstrated the effect of combined moderate  
121 to vigorous physical and muscle-strengthening activity guidelines on sampled adults from the  
122 US. The expected risk of bias was recall bias because it was a self-report study.

123 **Study 2** [23]: This cohort study was conducted in 2002 in the US. The types of exercises  
124 were running, jogging, rowing, cycling, swimming, and racquet sports. The target disease  
125 was coronary heart disease. The study aimed to explore the type, intensity, and amount of  
126 exercise with respect to the risk of coronary heart disease in men. The expected risk of bias  
127 was misclassification bias because it was a self-report study.

128 **Study 3** [24]: This cohort study was conducted in 2020 in Finland. The types of exercises  
129 were occupational exercise, walking or cycling to and from work, and Leisure-Time Physical  
130 Activity (LTPA). The target disease was coronary heart disease. The study aimed to prove the  
131 association between types of physical activity and a decade risk of MI using the Framingham  
132 risk score. The expected risk of bias was recall bias because it was a self-report study.

133 **Study 4** [25]: This cohort study was conducted in 2007 in the US, and the types of exercise  
134 were walking, gardening, exercise cycling, bowling, calisthenics, exercise machines, dancing,  
135 golfing, weight training, swimming, aerobics, and hiking. The target disease was MI. The  
136 study investigated the association between the amount of LTPA and reduction of MI risk.  
137 The expected risk of bias was recall bias because it was a self-report study.

138 **Study 5** [26]: This cohort study was conducted in 2016 in the US. The types of exercise  
139 considered were walking, gardening, cycling, bowling, calisthenics, exercise machines,  
140 dancing, golfing, weight training, swimming, aerobics, and hiking. The target disease was  
141 MI. The study aimed to investigate the association between the amount of LTPA and MI risk

142 reduction. The expected risk of bias was recall bias because it was a self-report study. The  
 143 authors also reported a possible underestimation of the association with MI risk for survivors.

144 **Study 6** [27]: This cohort study was conducted in 2019 in the US. The exercises considered  
 145 were aerobics, basketball, bicycling, calisthenics, golf walking, racquet sports, running,  
 146 swimming, walking, and weight training. The target disease was MI. The study assessed the  
 147 association between the volume of LTPA measured by the MET-hours/week. The expected  
 148 risk of bias was recall bias because it was a self-report study.

149 **Study 7** [28]: This cohort study was conducted in 2004 in Sweden. The types of exercise  
 150 were repetitive lifting at work, heavy lifting at work, and household work. The target disease  
 151 was MI. The study examined the relationship between participating in the types of exercise  
 152 and incidents of myocardial ischemia. The expected risk of bias was reporting and  
 153 misclassification bias because it was a self-report study.

154 **Table 1.** Literature review of studies.

| <b>Study No.</b> | <b>Authors</b>                              | <b>Date</b> | <b>Study Design</b> | <b>Types of Exercise</b>         | <b>Target disease</b>                           | <b>Country</b> | <b>Objectives</b>                                                  |
|------------------|---------------------------------------------|-------------|---------------------|----------------------------------|-------------------------------------------------|----------------|--------------------------------------------------------------------|
| <b>1</b>         | Bennie JA, De Cocker K, Teychenne MJ, Brown | 2019        | Cohort study        | Aerobics, weight training, mixed | Hypertension, MI, high cholesterol, stroke, CHD | USA            | To demonstrate the combined MVPA and MSA guidelines' effect on the |



|          |                                                                                         |      |                           |                                                                                 |     |         |                                                                                                                                      |
|----------|-----------------------------------------------------------------------------------------|------|---------------------------|---------------------------------------------------------------------------------|-----|---------|--------------------------------------------------------------------------------------------------------------------------------------|
|          | WJ, Biddle<br>SJH                                                                       |      |                           |                                                                                 |     |         | sampled adults<br>from the US                                                                                                        |
| <b>2</b> | Tanasescu<br>M,<br>Leitzmann<br>MF, Rimm<br>EB, Willett<br>WC,<br>Stampfer<br>MJ, Hu FB | 2002 | Cohort<br>study           | Running,<br>jogging,<br>rowing,<br>cycling,<br>swimming,<br>racquet sports      | CHD | USA     | To explore the<br>type, intensity,<br>and amount of<br>exercise in<br>relation to the<br>risk of coronary<br>heart disease in<br>men |
| <b>3</b> | Hu G,<br>Tuomilehto<br>J, Borodulin<br>K, Jousilahti<br>P                               | 2020 | Cohort<br>study           | Occupational<br>exercise,<br>walking or<br>cycling to and<br>from work,<br>LTPA | CHD | Finland | To prove<br>associations<br>between types<br>of physical<br>activity and a<br>decade risk of<br>CHD using the<br>FRS                 |
| <b>4</b> | Lovasi GS,<br>Lemaitre<br>RN,<br>Siscovick                                              | 2007 | Case-<br>control<br>study | Walking,<br>gardening,<br>exercise<br>cycling,                                  | MI  | USA     | To investigate<br>the association<br>between the<br>amount of                                                                        |

|   |                                                                              |      |                 |                                                                                                                                    |                           |     |                                                                                                  |
|---|------------------------------------------------------------------------------|------|-----------------|------------------------------------------------------------------------------------------------------------------------------------|---------------------------|-----|--------------------------------------------------------------------------------------------------|
|   | DS, Dublin<br>S, Bis JC,<br>Lumley T, et<br>al.                              |      |                 | bowling,<br>calisthenics,<br>exercise<br>machines,<br>dancing,<br>golfing, weight<br>training,<br>swimming,<br>aerobics,<br>hiking |                           |     | LTPA and<br>reduction of MI<br>risk                                                              |
| 5 | Chomistek<br>AK,<br>Henschel B,<br>Eliassen AH,<br>Mukamal<br>KJ, Rimm<br>EB | 2016 | Cohort<br>study | Jogging,<br>running,<br>bicycling,<br>swimming,<br>tennis                                                                          | CHD                       | USA | To assess the<br>association<br>between the<br>volume of<br>LTPA measured<br>by MET-<br>hours/wk |
| 6 | Porter AK,<br>Schilsky S,<br>Evenson<br>KR, Florido<br>R, Palta P,           | 2019 | Cohort<br>study | Aerobics,<br>basketball,<br>bicycling,<br>calisthenics,<br>golf walking,                                                           | Cardiovascular<br>disease | USA | To examine the<br>relationships<br>between<br>participation in<br>the types of                   |

|   |                                                                                             |      |                 |                                                                                  |    |        |                                                                                                                                                                                                                         |
|---|---------------------------------------------------------------------------------------------|------|-----------------|----------------------------------------------------------------------------------|----|--------|-------------------------------------------------------------------------------------------------------------------------------------------------------------------------------------------------------------------------|
|   | Holliday<br>KM, et al.                                                                      |      |                 | racquet sports,<br>running,<br>swimming,<br>walking,<br>weight training          |    |        | exercise and<br>incident<br>myocardial<br>ischemia                                                                                                                                                                      |
| 7 | Fransson E,<br>De Faire U,<br>Ahlbom A,<br>Reuterwall<br>C, Hallqvist<br>J, Alfredsson<br>L | 2004 | Cohort<br>study | Repetitive<br>lifting at work,<br>heavy lifting at<br>work,<br>household<br>work | MI | Sweden | For the<br>estimation of<br>household<br>work, exercise,<br>and<br>occupational<br>physical<br>activity, and<br>risk of acute MI<br>relatively. The<br>potential<br>interaction of<br>physical activity<br>was examined |

155 Abbreviations: CHD, coronary heart disease; FRS, Framingham risk score; LTPA, Leisure-  
156 Time Physical Activity; MET, metabolic equivalent of task; MI, myocardial infarction;  
157 MVPA moderate to vigorous physical activity; MSA, and muscle strengthening activity

158

## 159 **Quality assessment**

160 The NOS was utilized to assess the quality of the selected studies.

## 161 **Study outcomes**

162 Concerning the types of exercise that satisfied the US guidelines for physical activity, there  
163 were 11 values for aerobics, 6 for lifting, and 4 for mixed exercises. Regarding the details of  
164 physical activity, there were 4 values for aerobics, 1 for dancing, 1 for hiking, 2 for  
165 swimming, 1 for basketball, 1 for running, 1 for calisthenics, 1 for exercise machines, 3 for  
166 weight training, 1 for biking, 1 for bowling, and 1 for mixed exercises.

167 The study design analysis included 9 values for case-control studies and 12 for cohort studies.  
168 Target diseases comprised 12 values for MI; 4 for IHD, heart failure, or stroke; 3 for  
169 myocardial ischemia; and 2 for stroke. Trim and Fill analysis and a funnel plot analysis were  
170 performed to assess publication bias; however, none was observed (S1 Table 1).

## 171 **Primary outcomes**

172 Regarding heterogeneity of the studies, 96.1% of the included studies had a very high level of  
173 heterogeneity when the random effects model was used. The overall effect of types of  
174 physical activity on IHD was OR: 0.744 (95% CI: 0.740–0.748). The ORs for the standards  
175 used were 0.813 (95% CI: 0.779–0.849) for aerobics, 0.917 (95% CI: 0.823–1.023) for  
176 weight training, and 0.681 (95% CI: 0.637–0.727) for mixed exercises. For the target  
177 diseases, the OR for hypertension was 0.752 (95% CI: 0.647–0.875), 0.819 (95% CI: 0.716–  
178 0.938) for high cholesterol, 0.703 (95% CI: 0.634–0.779) for MI, 0.788 (95% CI: 0.751–  
179 0.826) for IHD, 0.788 (95% CI: 0.715–0.869) for stroke, and 0.846 (95% CI: 0.788–0.909)  
180 for heart failure. Across countries, the OR for studies in the US was 0.773 (95% CI: 0.742–

181 0.805), 0.702 (95% CI: 0.619–0.797) for those in Finland, and 0.779 (95% CI: 0.678–0.896)  
182 for those in Sweden (Fig 2). The funnel plot and trim and fill analysis showed no publication  
183 bias (S1 Fig).

184 **Fig 2.** Forest plot generated by types of exercise. TE, estimated treatment effect; seTE,  
185 standard error of treatment estimate; OR, odds ratio; CI, confidence interval

## 186 **Secondary outcomes**

187 Regarding heterogeneity of the studies, 16.1% of the studies showed heterogeneity. The ORs  
188 of aerobics, weight training, and mixed exercises were 0.607 (95% CI: 0.469–0.787), 0.569  
189 (95% CI: 0.388–0.833), and 0.585 (95% CI: 0.370–0.924), respectively (Fig 3).

190 **Fig 3.** Forest plot generated by standard satisfaction. TE, estimated treatment effect; seTE,  
191 standard error of treatment estimate; OR, odds ratio; CI, confidence interval

192 For target diseases, the ORs for IHD were 0.515 (95% CI: 0.401–0.662), 0.777 (95% CI:  
193 0.540–1.116), and 0.630 (95% CI: 0.356–1.114), respectively (Fig 4).

194 **Fig 4.** Forest plot generated by target disease from studies that satisfied the US guidelines.  
195 MI, myocardial infarction; CHD, coronary heart disease; TE, estimated treatment effect;  
196 seTE, standard error of treatment estimate; OR, odds ratio; CI, confidence interval

197 For study designs, the OR for case-control studies was 0.503 (95% CI: 0.383–0.661) and  
198 0.703 (95% CI: 0.533–0.927) for cohort studies. When exercises were included in the model,  
199 the OR for LTPA was 0.503 (95% CI: 0.383–0.661); 0.733 (95% CI: 0.444–1.212) for  
200 aerobics; 0.880 (95% CI: 0.341–2.272) for basketball; 0.680 (95% CI: 0.327–1.415) for  
201 running; 1.000 (95% CI: 0.340–2.939) for swimming; 0.738 (95% CI: 0.384–1.421) for  
202 weight training; and 0.540 (95% CI: 0.301–0.968) for mixed exercises.

## 203 **Discussion**

204 Our study showed that aerobics and weight training have beneficial effects on IHD. Without  
205 the US guidelines for physical activity, there was a high level of heterogeneity in the effects  
206 of physical activity by type, with overall effects of 0.764 (OR; 95% CI: 0.737–0.795). No  
207 publication bias was observed. However, after applying the US guidelines for physical  
208 activity, there was a low level of heterogeneity in its effects and an observed OR of 0.515  
209 (95% CI: 0.401–0.662) for MI. A significant reduction in the heterogeneity of the studies  
210 after applying the US guidelines suggests that these recommend certain levels of exercise  
211 intensity and include the duration of exercise irrespective of the types of exercise. There was  
212 no significant difference among countries. In a previous related study, increased physical  
213 activity was found to be associated with lower blood pressure in hypertensive individuals,  
214 increased high-density lipoprotein cholesterol levels in a dose-response manner, and reduced  
215 incidence of diabetes [29]. The health benefits of physical activity can be achieved by  
216 engaging in moderate-intensity physical activity (brisk walking) for at least 30 min per day, 5  
217 days per week, or vigorous activity (jogging) for 20 min or more, 3 days per week.  
218 Combinations of the two types of activity can also be performed. Furthermore, a mendelian  
219 randomization study reported that genetically predicted self-reported vigorous physical  
220 activity was significantly associated with a lower risk of MI (OR: 0.24, 95% CI: 0.08–0.68;  
221 p-value: 0.007) [30]. Additionally, those results were consistent after the sensitivity analysis.  
222 The INTERHEART study demonstrated that regular exercise reduced the risk of MI (OR:  
223 0.86) [31]. A different study, which followed 84,129 women who engaged in moderate or  
224 vigorous exercise for over 30 min per day, reported a relative risk of 0.17 [32].

225 The strength of the current study was that the beneficial effects of physical activity on  
226 cardiovascular health were reported with the US guidelines for physical activity. The level,

227 types, and intensity of physical activity were associated with the regular and designed  
228 guidelines for physical activity.

229 This study had some limitations. First, there was a possibility of length bias in the mixed  
230 session; therefore, the OR may have been lower. Second, we classified the exercise types, but  
231 did not account for the baseline and post-exercise development of muscle or body fat. For  
232 example, a research article published in 2015 found that quadriceps strength was highly  
233 correlated with reduced mortality due to coronary artery disease [33].

## 234 **Conclusions**

235 Although many research papers have focused on exercise and its efficiency in MI risk  
236 reduction, the association between this reduction and exercise type has not been well-  
237 researched. This study conducted a meta-analysis to assess which types of exercise efficiently  
238 reduce MI and assess efficiency according to the US guidelines for physical activity. This  
239 study concluded that beneficial results were obtained if the US guidelines for physical  
240 activity were followed. This also shows the need for the implementation of health policies  
241 regarding regular physical activity, which could aid in preventing an increase in IHD  
242 incidence and its negative outcomes, especially MI. Community-based programs for regular  
243 physical activity are reportedly effective in reducing the IHD risk [11]. Therefore, community  
244 and national programs, such as the “move your way” program, should be implemented to  
245 improve the population’s cardiovascular health [11].

246 Further research should aim to show the efficiency of IHD risk reduction, as previous case-  
247 control studies with experimental design have shown the likelihood of patients with IHD  
248 benefitting from regular exercise practice.

249

250 **Author contributions**

251 **Jaewoo Cha:** the conception and design of the study, or acquisition of data, or analysis and  
252 interpretation of data, drafting the article or revising it critically for important intellectual  
253 content.. **Kwan Hong:** final approval of the version to be submitted., **Jeehyun Kim:** final  
254 approval of the version to be submitted.

255



## 256 **References**

257 [1] A.E. Moran , Epidemiology and global burden of ischaemic heart disease”. In: A.J. Camm  
258 et al., (Eds.) The ESC Textbook of Cardiovascular Medicine. third ed., ESC Publishing,  
259 Oxford, 2018,. pp. 297–304.

260 [2] Mayo Clinic, Myocardial ischemia, Mayo Foundation for Medical Education and  
261 Research. [https://www.mayoclinic.org/diseases-conditions/myocardial-ischemia/symptoms-](https://www.mayoclinic.org/diseases-conditions/myocardial-ischemia/symptoms-causes/syc-20375417)  
262 [causes/syc-20375417](https://www.mayoclinic.org/diseases-conditions/myocardial-ischemia/symptoms-causes/syc-20375417) (accessed 7 November, 2022).

263 [3] C. Dong, X. Bu, J. Liu, L. Wei, A. Ma, T. Wang, Cardiovascular disease burden  
264 attributable to dietary risk factors from 1990 to 2019: A systematic analysis of the Global  
265 Burden of Disease study, *Nutr. Metab. Cardiovasc. Dis.* 32 (2022) 897–907.  
266 <https://doi.org/10.1016/j.numecd.2021.11.012>.

267 [4] World Health Organization. Physical activity. [https://www.who.int/news-room/fact-](https://www.who.int/news-room/factsheets/detail/physical-activity)  
268 [sheets/detail/physical-activity](https://www.who.int/news-room/factsheets/detail/physical-activity) (accessed 11 October, 2022).

269 [5] C. Fiuza-Luces, A. Santos-Lozano, M. Joyner, P. Carrera-Bastos, O. Picazo, J.L. Zugaza,  
270 et al, Exercise benefits in cardiovascular disease: beyond attenuation of traditional risk  
271 factors, *Nat. Rev. Cardiol.* 15 (2018) 731–743. <https://doi.org/10.1038/s41569-018-0065-1>.

272 [6] M. Jetté, K. Sidney, G. Blümchen, Metabolic equivalents (METs) in exercise testing,  
273 exercise prescription, and evaluation of functional capacity, *Clin. Cardiol.* 13 (1990) 555–  
274 565. <https://doi.org/10.1002/clc.4960130809>.

275 [7] H.D. Sesso, R.S. Paffenbarger, T. Ha, I.M. Lee, Physical activity and cardiovascular  
276 disease risk in middle-aged and older women, *Am. J. Epidemiol.* 150 (1999) 408–416.  
277 <https://doi.org/10.1093/oxfordjournals.aje.a010020>.

- 278 [8] Centers for Disease Control and Prevention, Prompts to encourage physical activity.  
279 [https://www.cdc.gov/physicalactivity/activepeoplehealthnation/strategies-to-increase-](https://www.cdc.gov/physicalactivity/activepeoplehealthnation/strategies-to-increase-physical-activity/prompts-to-encourage-physical-activity.html)  
280 [physical-activity/prompts-to-encourage-physical-activity.html](https://www.cdc.gov/physicalactivity/activepeoplehealthnation/strategies-to-increase-physical-activity/prompts-to-encourage-physical-activity.html) (accessed 11 October, 2022).
- 281 [9] W. Ahrens, Evaluation of policy measures to promote a healthy diet and physical activity:  
282 the PEN project, *Eur. J. Public. Health.* 30 (2020) ckaa165.325.  
283 <https://doi.org/10.1093/eurpub/ckaa165.325>
- 284 [10] Centers for Disease Control and Prevention, Physical activity.  
285 <https://www.cdc.gov/physicalactivity/index.html> (Accessed 11 October, 2022).
- 286 [11] US Department of Health and Human Services, Move Your Way. Walk. R Univ Dance.  
287 Play. What's Your Move? <https://health.gov/moveyourway> (accessed 11 October, 2022).
- 288 [12] N.M. Arias-Palencia, M. Solera-Martínez, L. Gracia-Marco, P. Silva, V. Martínez-  
289 Vizcaíno, J. Cañete-García-Prieto, et al, Levels and patterns of objectively assessed physical  
290 activity and compliance with different public health guidelines in university students *PLoS*  
291 *One.* 10 (2015) e0141977. <https://doi.org/10.1371/journal.pone.0141977>.
- 292 [13] M. Weed, Evidence for physical activity guidelines as a public health intervention:  
293 efficacy, effectiveness, and harm – A critical policy sciences approach, *Health. Psychol.*  
294 *Behav. Med.* 4 (2016) 56–69. <https://doi.org/10.1080/21642850.2016.1159517>.
- 295 [14] R.R. Pate, P.S. Freedson, J.F. Sallis, W.C. Taylor, J. Sirard, S.G. Trost, et al,  
296 Compliance with physical activity guidelines: prevalence in a population of children and  
297 youth, *Ann. Epidemiol.* 12 (2002) 303–308. [https://doi.org/10.1016/s1047-2797\(01\)00263-0](https://doi.org/10.1016/s1047-2797(01)00263-0).
- 298 [15] M.R. Carnethon, Physical activity and cardiovascular disease: how much is enough, *Am.*  
299 *J. Lifestyle. Med.* 3 (2009) 44S–49S. <https://doi.org/10.1177/1559827609332737>.

- 300 [16] P.J. Teixeira, E.V. Carraça, D. Markland, M.N. Silva, R.M. Ryan, Exercise, physical  
301 activity, and self-determination theory: a systematic review, *Int. J. Behav. Nutr. Phys. Act.* 9  
302 (2012) 78. <https://doi.org/10.1186/1479-5868-9-78>.
- 303 [17] Microsoft Corporation. Microsoft Excel [internet]; 2018. Microsoft Website.  
304 <https://office.microsoft.com/excel> (accessed 28 September 2022).
- 305 [18] The Ottawa Hospital Research Institute. The Newcastle-Ottawa Scale (NOS) for  
306 assessing the quality of nonrandomized studies in meta-analyses.  
307 [https://www.ohri.ca/programs/clinical\\_epidemiology/oxford.asp](https://www.ohri.ca/programs/clinical_epidemiology/oxford.asp) (accessed 28 September  
308 2022).
- 309 [19] P.T. von Hippel, The heterogeneity statistic  $I(2)$  can be biased in small meta-analyses,  
310 *BMC Med. Res. Methodol.* 15 (2015) 35. <https://doi.org/10.1186/s12874-015-0024-z>.
- 311 [20] J.A. Sterne, A.J. Sutton, J.P. Ioannidis, N. Terrin, D.R. Jones, J. Lau, et al,  
312 Recommendations for examining and interpreting funnel plot asymmetry in meta-analyses of  
313 randomised controlled trials, *BMJ.* 343 (2011) d4002. <https://doi.org/10.1136/bmj.d4002>.
- 314 [21] RStudio Team RStudio: Integrated Development for R. RStudio, PBC, Boston, MA  
315 (2020) URL <http://www.rstudio.com/> (accessed 28 September 2022).
- 316 [22] J.A. Bennie, K. De Cocker, M.J. Teychenne, W.J. Brown, S.J.H. Biddle, The  
317 epidemiology of aerobic physical activity and muscle-strengthening activity guideline  
318 adherence among 383,928 U.S. adults, *Int. J. Behav. Nutr. Phys. Act.* 16 (2019) 34.  
319 <https://doi.org/10.1186/s12966-019-0797-2>.

- 320 [23] M. Tanasescu, M.F. Leitzmann, E.B. Rimm, W.C. Willett, M.J. Stampfer, F.B. Hu,  
321 Exercise type and intensity in relation to coronary heart disease in men, *JAMA*. 288 (2002)  
322 1994–2000. <https://doi.org/10.1001/jama.288.16.1994>.
- 323 [24] G. Hu, J. Tuomilehto, K. Borodulin, P. Jousilahti, The joint associations of occupational,  
324 commuting, and leisure-time physical activity, and the Framingham risk score on the 10-year  
325 risk of coronary heart disease, *Eur. Heart. J.* 28 (2007) 492–498.  
326 <https://doi.org/10.1093/eurheartj/ehl475>.
- 327 [25] G.S. Lovasi, R.N. Lemaitre, D.S. Siscovick, S. Dublin, J.C. Bis, T. Lumley, et al,  
328 Amount of leisure-time physical activity and risk of nonfatal myocardial infarction, *Ann.*  
329 *Epidemiol.* 17 (2007) 410–416. <https://doi.org/10.1016/j.annepidem.2006.10.012>.
- 330 [26] A.K. Chomistek, B. Henschel, A.H. Eliassen, K.J. Mukamal, E.B. Rimm, Frequency,  
331 type, and volume of leisure-time physical activity and risk of coronary heart disease in young  
332 women, *circulation*. 134 (2016) 290–299.  
333 <https://doi.org/10.1161/CIRCULATIONAHA.116.021516>.
- 334 [27] A.K. Porter, S. Schilsky, K.R. Evenson, R. Florido, P. Palta, K.M. Holliday, A.R.  
335 Folsom, The association of sport and exercise activities with cardiovascular disease risk: The  
336 Atherosclerosis Risk in Communities (ARIC) Study, *J. Phys. Act. Health.* 16 (2019) 698–  
337 705. <https://doi.org/10.1123/jpah.2018-0671>.
- 338 [28] E. Fransson, U. De Faire, A. Ahlbom, C. Reuterwall, J. Hallqvist, L. Alfredsson, The  
339 risk of acute myocardial infarction: interactions of types of physical activity, *Epidemiology*.  
340 15 (2004) 573–582. <https://doi.org/10.1097/01.ede.0000134865.74261.fe>.
- 341 [29] K.M. Kessler, Primary prevention of coronary heart disease in women through diet and  
342 lifestyle, *N. Engl. J. Med.* 343 (2000) 1814. <https://doi.org/10.1056/NEJM200007063430103>

- 343 [30] H.D. Sesso, R.S. Paffenbarger, I.M. Lee, Physical activity and coronary heart disease in  
344 men: The Harvard Alumni Health Study, *Circulation*. 102 (2000) 975–980.  
345 <https://doi.org/10.1161/01.cir.102.9.975>
- 346 [31] I.M. Lee, H.D. Sesso, Y. Oguma, R.S. Paffenbarger, Relative intensity of physical  
347 activity and risk of coronary heart disease, *Circulation*. 107 (2003) 1110–1116.  
348 <https://doi.org/10.1161/01.cir.0000052626.63602.58>.
- 349 [32] S. Yusuf, S. Hawken, S. Ounpuu, T. Dans, A. Avezum, F. Lanas, et al, Effect of  
350 potentially modifiable risk factors associated with myocardial infarction in 52 countries (the  
351 INTERHEART study): case-control study, *Lancet*. 364 (2004) 937–952.  
352 [https://doi.org/10.1016/S0140-6736\(04\)17018-9](https://doi.org/10.1016/S0140-6736(04)17018-9).
- 353 [33] K. Kamiya, T. Masuda, S. Tanaka, N. Hamazaki, Y. Matsue, A. Mezzani, et al,  
354 Quadriceps Strength as a Predictor of Mortality in Coronary Artery Disease, *Am. J. Med.* 128  
355 (2015) 1212–1219. <https://doi.org/10.1016/j.amjmed.2015.06.035>.
- 356

357 **Supporting information**

358 **S1 Table. Newcastle-Ottawa Scale of study assessment.**

359 **S1 Fig. Funnel plot of study**



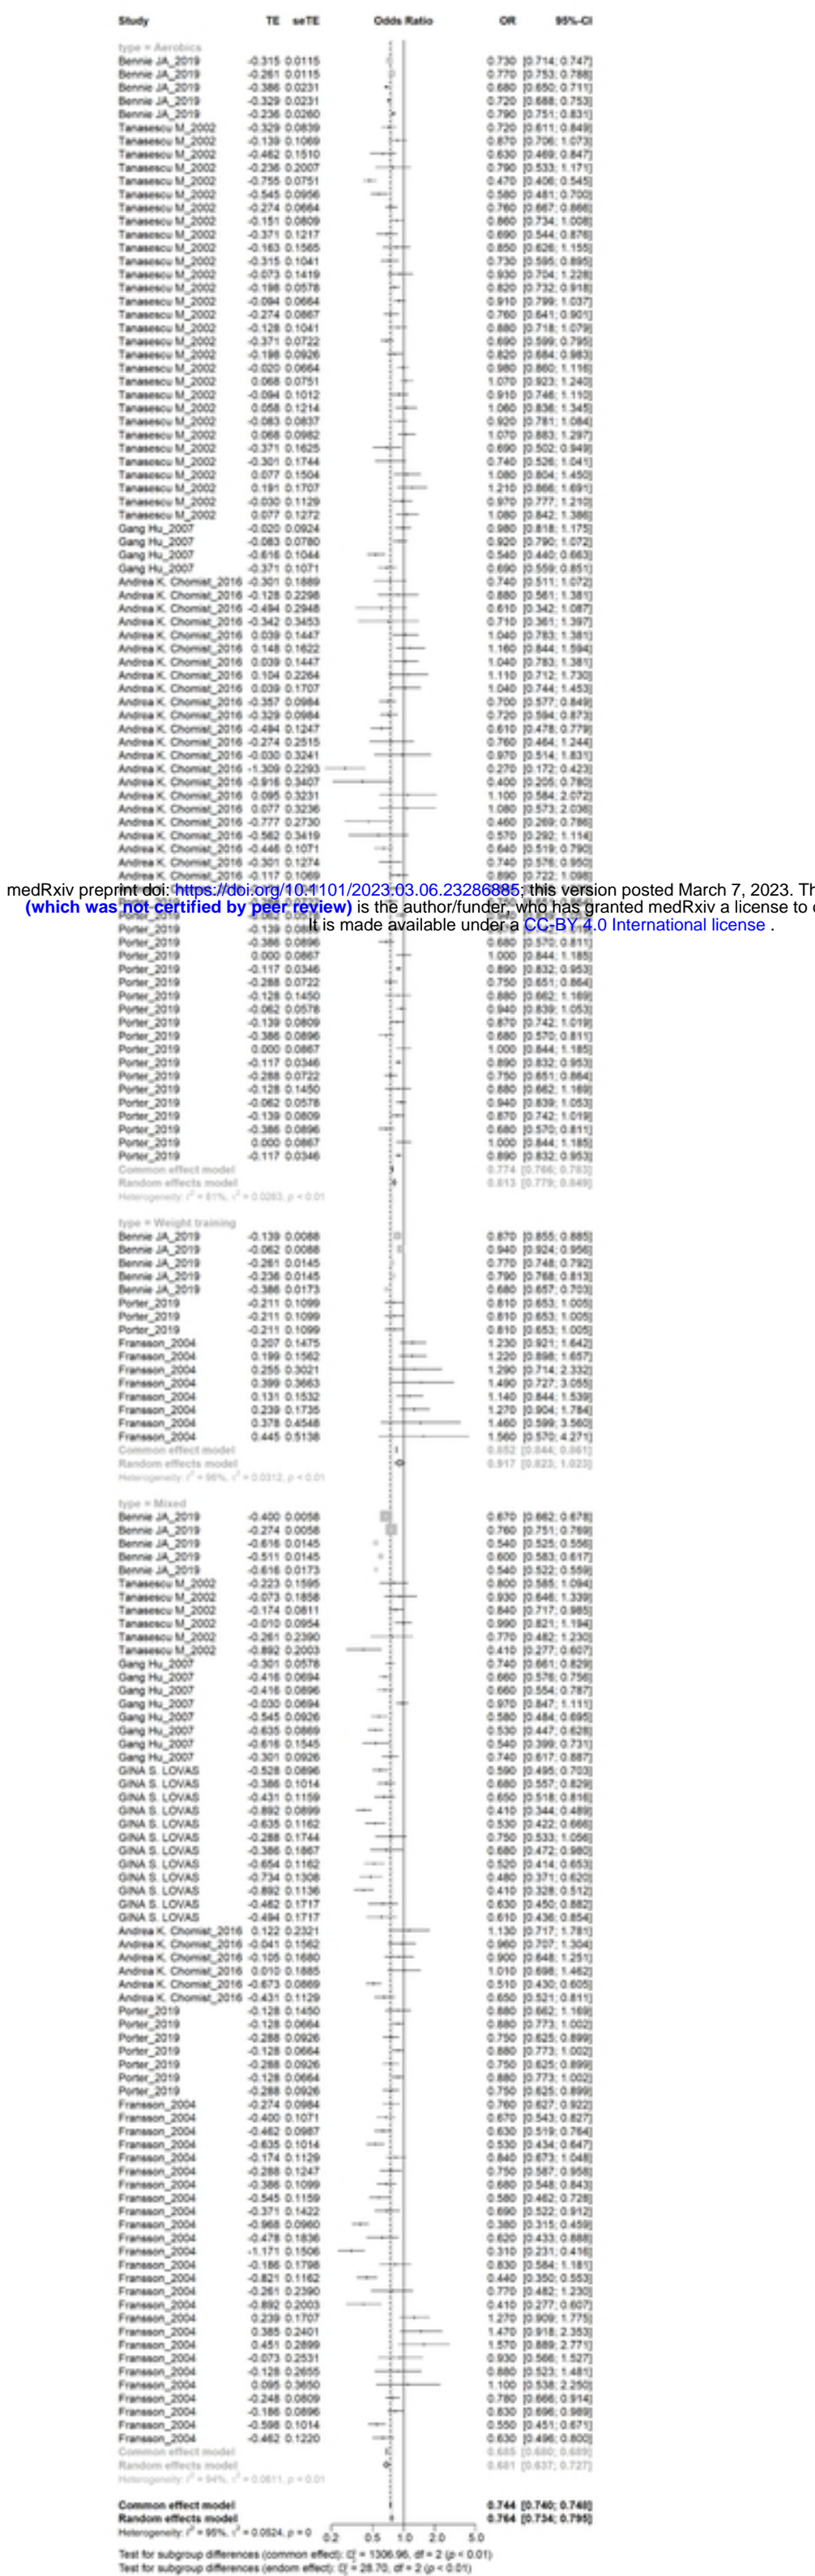



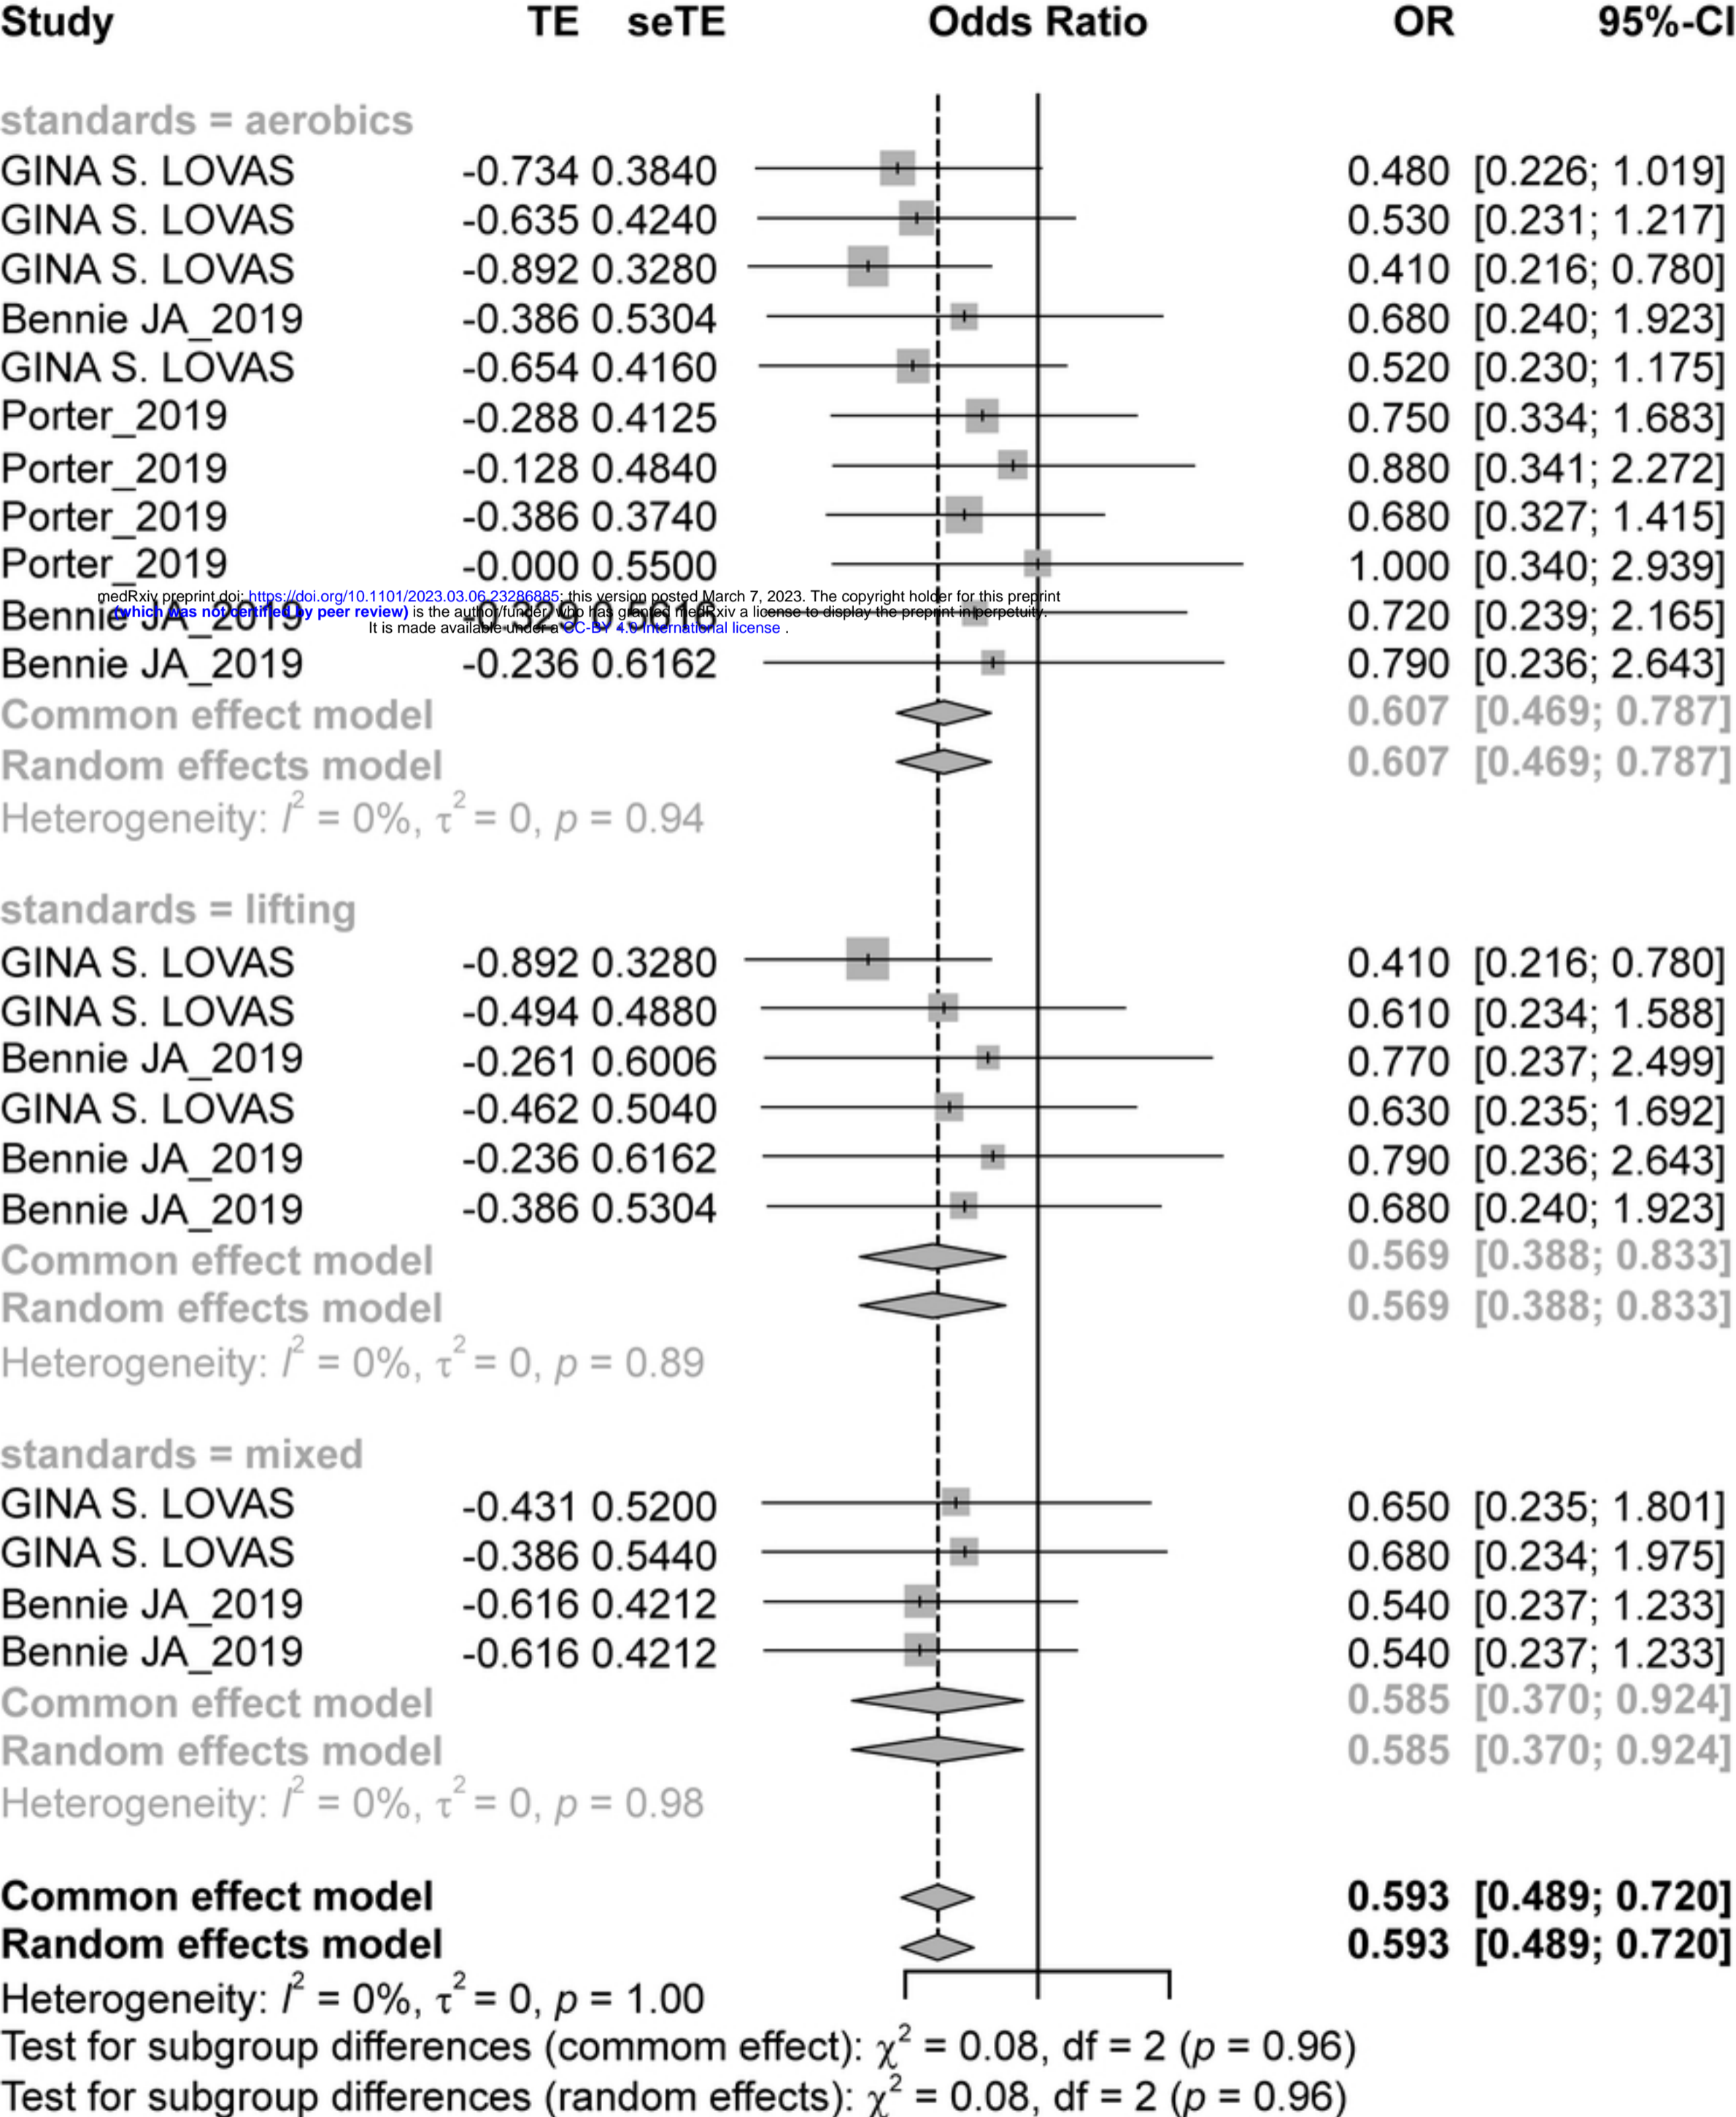

Figure 3

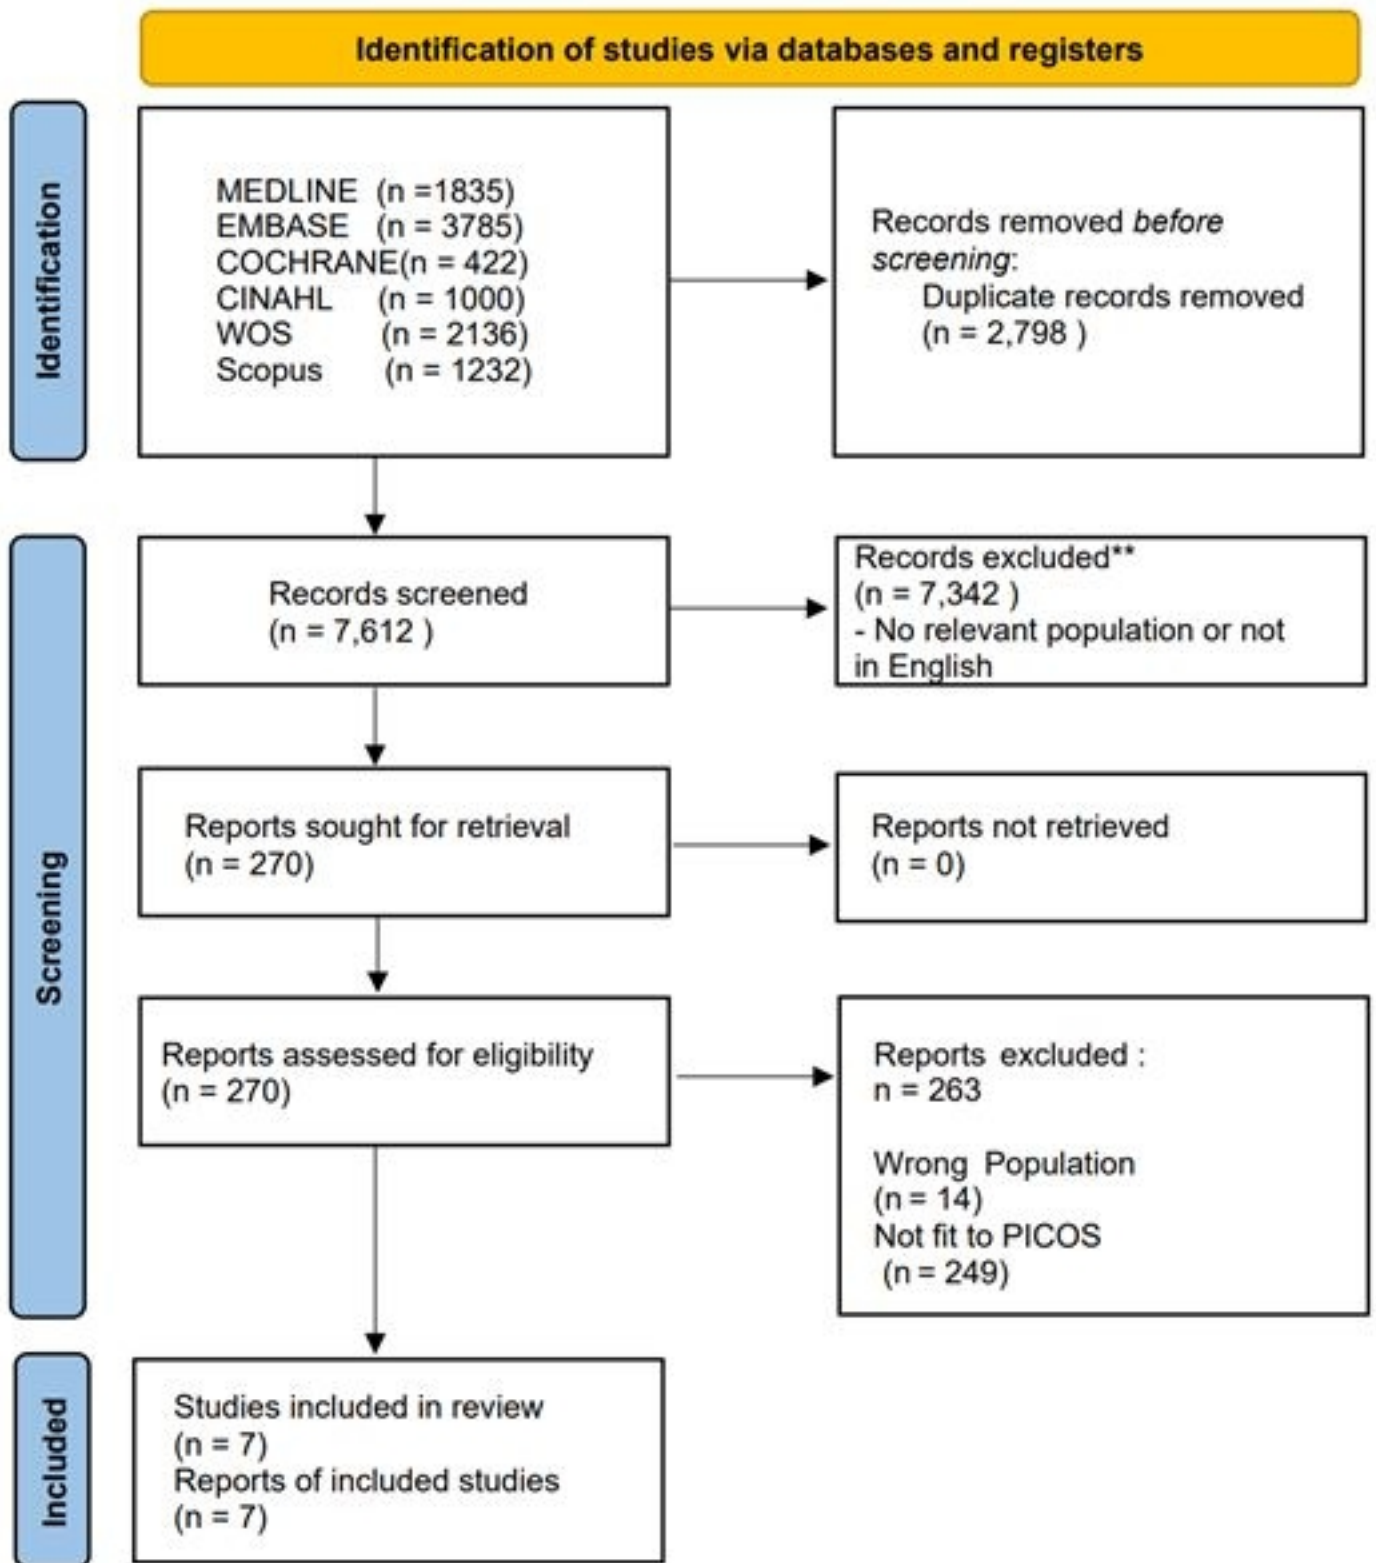

Figure 1

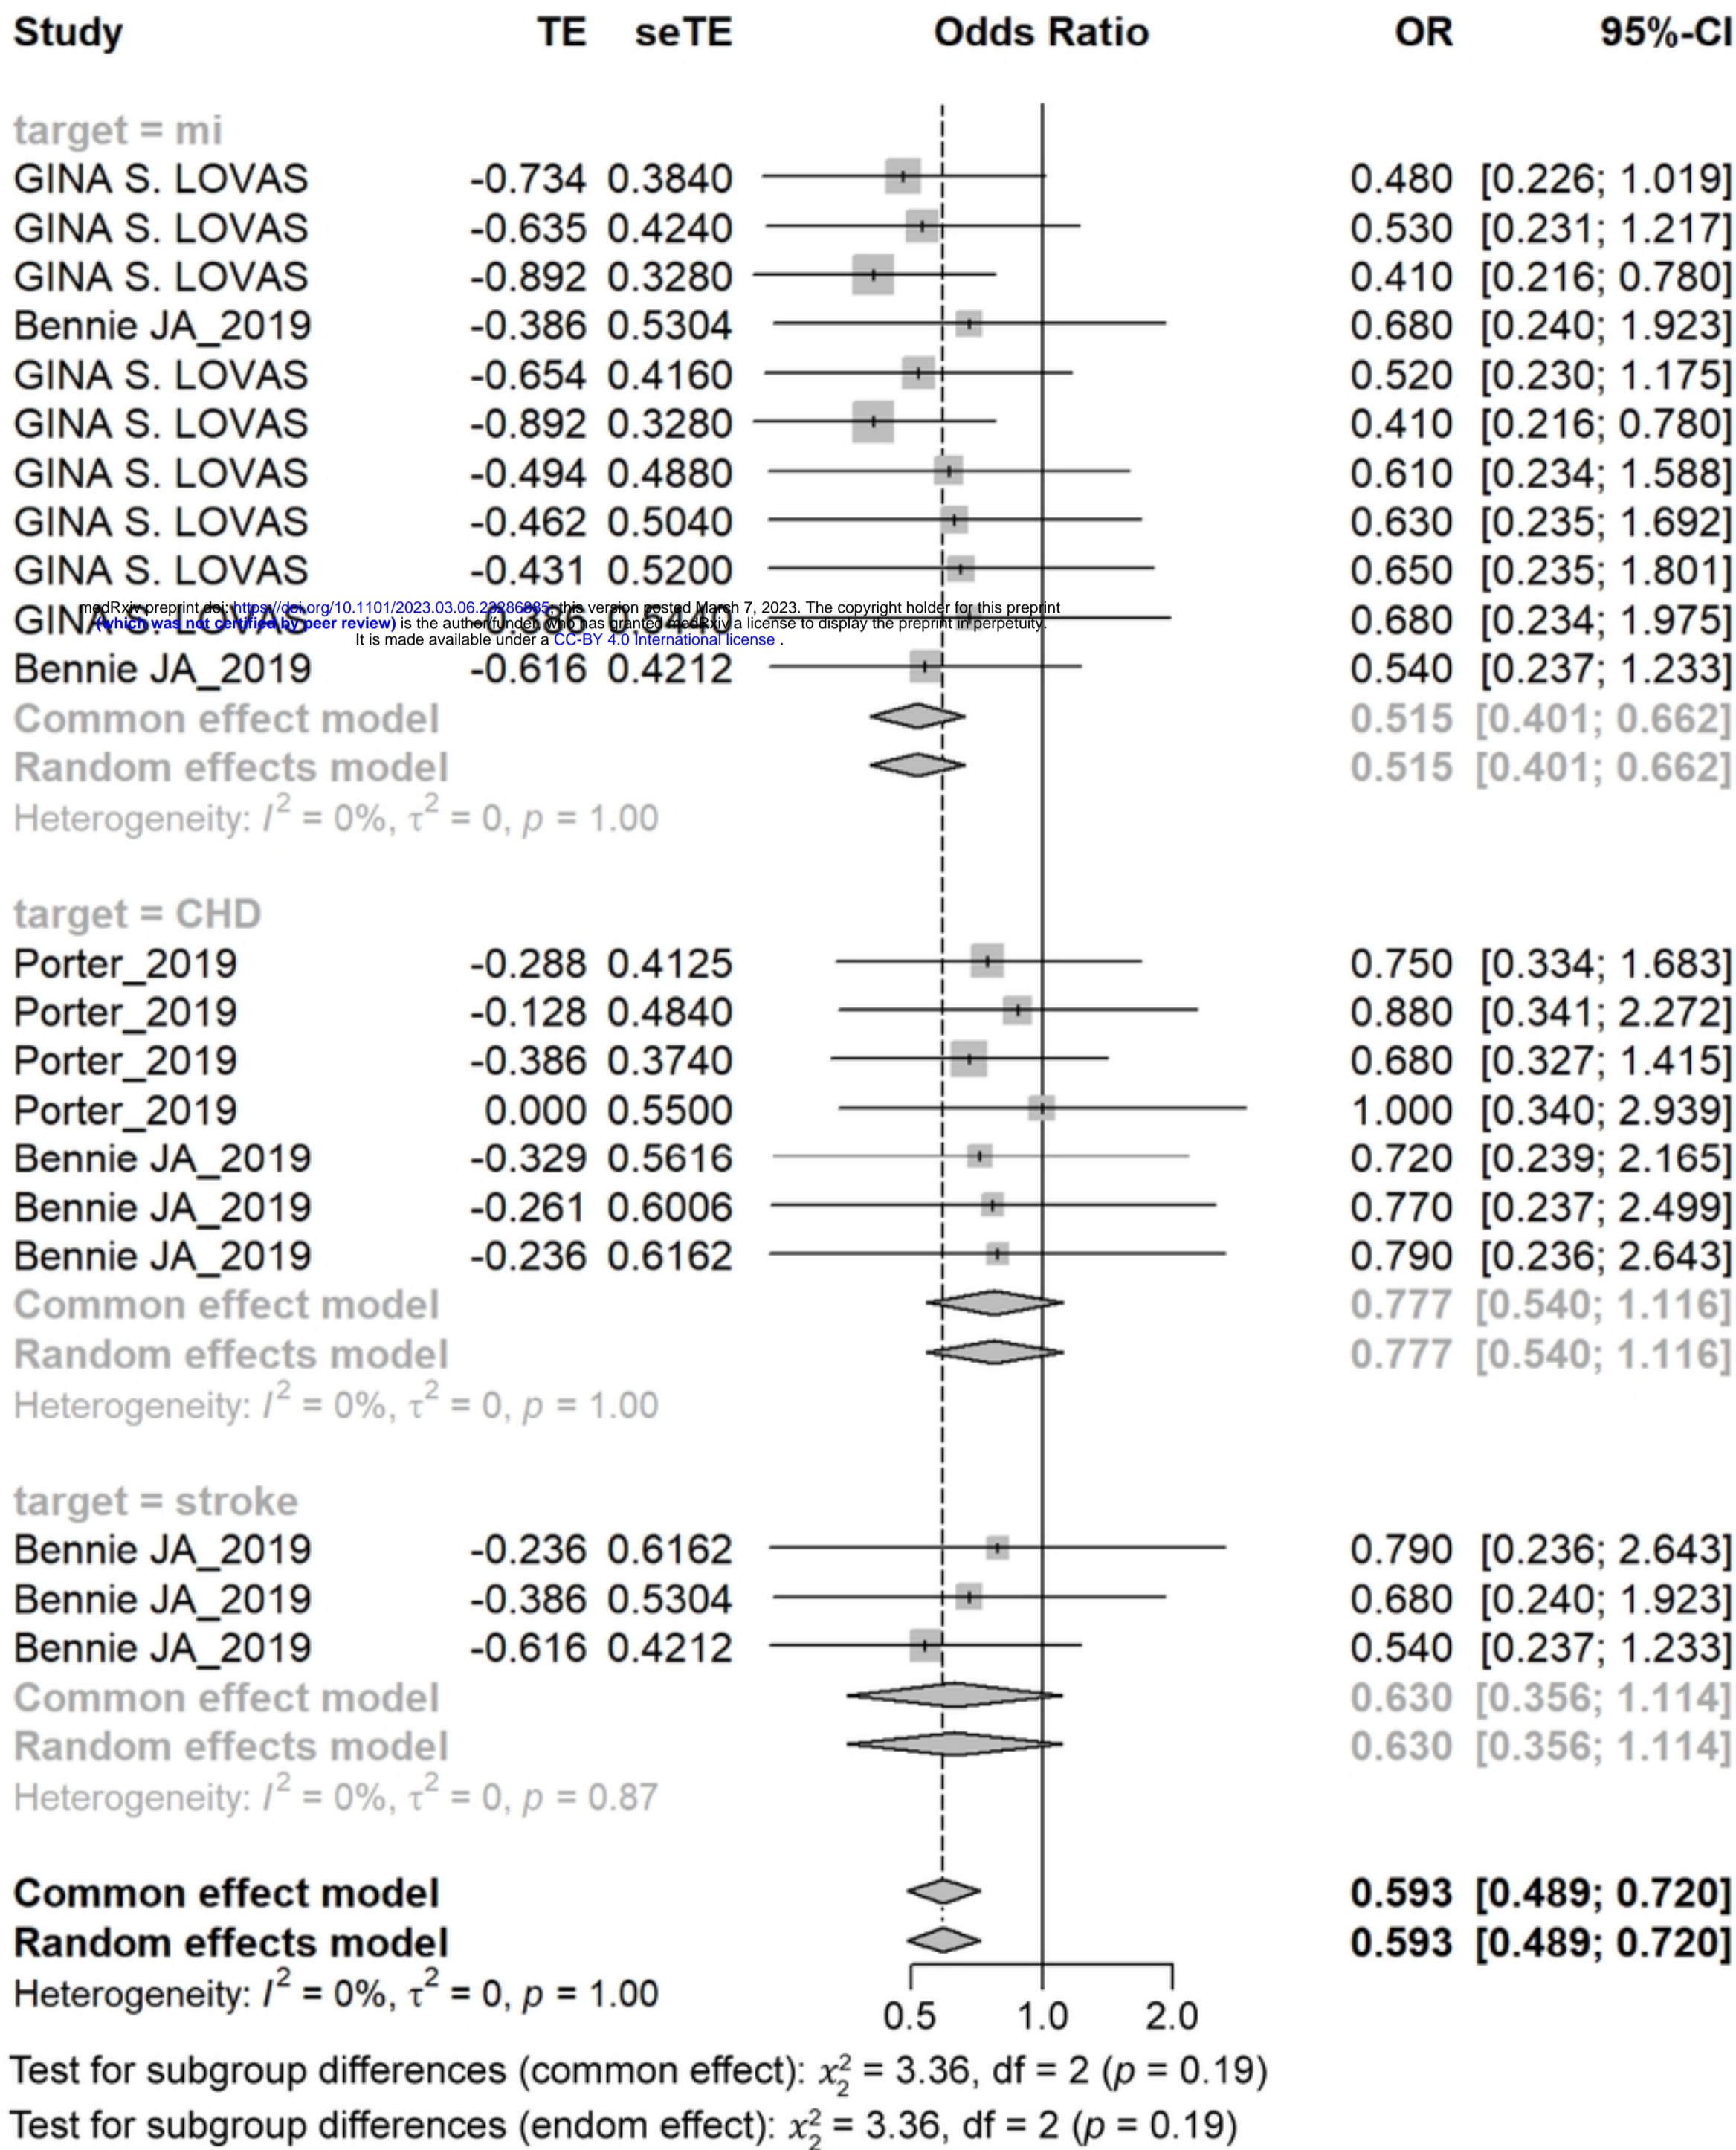

Figure 4
